# Supplementary material for: Health equity in an unequal country: the use of medical services in Chile
Source: Int J Equity Health. 2012 Dec 18;11:81. doi: 10.1186/1475-9276-11-81 (PMC3544610; doi:10.1186/1475-9276-11-81)
Supplement: Additional file 1 — Appendix Table A.1. Generalized Negative Binomial Regression Coefficients. Chile 2003. [file 1475-9276-11-81-S1.xlsx]

## Sheet: Hoja1
Generalized Negative Binomial Regression Coefficients: Chile 2003
	General Practitioner		Specialists		Emergency Room visits		Laboratory Exams		X-ray and Ultrasounds		Hospitalization days
Log income per adult equivalent	-0.0902888	*	0.162227	*	-0.11251	*	0.0935628	*	0.119639	*	-0.0560032
Female 5-14 years old	-0.184881	*	-0.52417	*	-0.589996	*	-0.227073		-0.252441		-1.17384	*
Female 15-34 years old	-0.236711	*	-0.200856	*	-0.627257	*	0.44223	*	0.145041		0.245723
Female 35-44 years old	0.0590721		0.0068534		-0.653464	*	0.894117	*	0.282091	**	-0.119584
Female 45-59 years old	0.288405	*	0.420069	*	-0.388064	*	1.25459	*	0.527565	*	0.20317
Female 60 years old and more	0.480676	*	0.358388	*	-0.31011	*	1.42962	*	0.818002	*	0.494509
Male 5-14 years old	-0.185911	*	-0.500431	*	-0.56517	*	-0.585986	*	-0.399354	*	-1.02291	*
Male 15-44 years old	-0.793671	*	-0.778152	*	-0.984292	*	-0.373203	*	-0.468685	*	-0.77151	*
Male 45-64 years old	-0.328642	*	-0.30347	*	-0.90049	*	0.639893	*	-0.194826		0.309647
Male 65 years old and more	0.197834	**	0.244994	**	-0.562995	*	1.11857	*	0.505665	*	0.677596	**
Physical disability	0.270156	*	0.890996	*	0.510176	*	0.552337	*	0.593169	*	1.09755	*
Low education	-0.0614433		-0.370498	*	0.125138		-0.332315	*	-0.276695	*	-0.0062502
Middle Education	-0.0020359		-0.187623	*	0.0622305		-0.138846		-0.124766		0.144706
Unemployed	-0.020888		0.147297	*	-0.016866		0.0998606		0.106731		0.180798
Aboriginal ethinic group	0.0788734		0.132776		-0.0565506		0.0378655		0.169316		0.0759151
Rural Area	-0.0712109	**	-0.25365	*	-0.49327	*	-0.326373	*	-0.479106	*	-0.0562155
Region 1	-0.343999	**	-0.26565		0.0437269		-0.271637		-0.137602		-0.290911
Region 2	0.132428		-0.159849		0.415244	*	0.249123		0.268951		0.357577	**
Region 3	-0.471988	*	-0.340734	*	0.0490627		-0.277346		-0.144548		-0.0966961
Region 4	0.075206		-0.231813	*	0.288336	*	-0.110779		-0.262443	**	-0.104598
Region 5	-0.139665	**	-0.198722	**	0.252282	*	-0.214277	**	-0.331747	*	0.0019373
Region 6	-0.0649577		-0.170591	**	0.244142	*	0.291577	*	0.011899		-0.0640315
Region 7	0.0234557		-0.245033	*	0.171871	**	0.355639	*	0.0245252		0.0049892
Region 8	-0.156604		-0.258106	*	-0.002344		0.0474021		-0.093218		-0.0198326
Region 9	0.0505583		-0.403039	*	0.2412	*	-0.199788		-0.256481		0.226388	**
Region 10	-0.0882411		-0.519417	*	0.28067	*	-0.181473	**	-0.261494	*	-0.079742
Region 11	0.0531235		-0.532269	*	0.418616	**	-0.156285		-0.0105609		0.231265
Region 12	0.0738536		-0.0231413		0.61676	*	0.324269		0.432254	**	0.184529
Married/Cohabitting	0.0615801		0.0396038		0.0792845	**	0.234554	*	0.197253	*	0.358106	*
Public Insurance System (FONASA)	-0.0621762		-0.250816	*	0.328565	*	-0.186419	**	-0.418612	*	0.130224
No insurance	-0.778807	*	-1.0693	*	-0.327029	*	-1.12928	*	-1.17866	*	-0.513735
Constant	-0.615865	**	-2.8674	*	-0.919491	*	-3.44995	*	-3.91303	*	-0.509933
lnalpha
	General Practitioner		Specialists		Emergency Room visits		Laboratory Exams		X-ray and Ultrasounds		Hospitalization days
Log income per adult equivalent	-0.089769	**	-0.153286	*	0.0282291		-0.0741929	**	-0.0397581		0.0240458
Female 5-14 years old	-0.107433		0.152107		0.16965		0.466251	*	0.108877		0.485567	*
Female 15-34 years old	0.381641	*	-0.0629357		0.545622	*	-0.292554	**	-0.185269		-0.616365	*
Female 35-44 years old	0.125024		-0.143515		0.773103	*	-0.472433	*	-0.142641		-0.333169	*
Female 45-59 years old	-0.121767		-0.50265	*	0.579959	*	-0.854358	*	-0.625934	*	-0.0842128
Female 60 years old and more	-0.290621	**	-0.803106	*	0.247875		-1.13117	*	-0.582614	**	-0.264792	**
Male 5-14 years old	0.102648		0.295023	**	0.0525677		0.610476	*	0.29429		0.343798	*
Male 15-44 years old	0.387094	*	0.849524	*	0.413448	*	0.526222	*	0.724904	*	0.580347	*
Male 45-64 years old	0.386872	*	0.190982		0.827753	*	-0.186637		0.0657793		0.286023	*
Male 65 years old and more	0.0598537		-0.239534		0.392531	**	-0.863275	*	-0.160677		-0.428555	*
Physical disability	-0.101655		-0.542476	*	0.0703343		-0.219798	**	-0.0182559		-0.404721	*
Low education	0.0484149		0.594366	*	0.258602	**	-0.0527192		0.294984	**	0.325694	*
Middle Education	0.0552913		0.406078	*	0.262809	**	-0.0948032		0.141806		0.167634	**
Unemployed	-0.0396862		-0.15238	*	0.212275	**	-0.125868	**	-0.100573		-0.178818	*
Aboriginal ethinic group	-0.156588		0.0520038		-0.15863		-0.309383	**	-0.0039909		0.0267667
Rural Area	-0.0293612		0.389031	*	0.295998	*	0.219625	*	0.547781	*	0.159375	*
Region 1	0.0548114		0.543501	*	0.190492		0.0915748		0.497834	*	0
Region 2	0.0350841		0.0474678		-0.0011966		0.0767803		0.0898489		-0.279729	*
Region 3	0.163383		0.380768	**	0.109473		-0.0470686		-0.238074		-0.123572
Region 4	-0.532914	*	-0.215577		-0.525974	*	-0.287495	**	0.0016038		-0.0777769
Region 5	-0.196482	**	-0.0521509		-0.361471	*	-0.0719839		0.075904		0.0820355
Region 6	-0.517842	*	-0.203154	**	-0.0472031		-0.109346		0.100625		-0.0177036
Region 7	-0.382072	*	-0.137747		-0.356705	*	-0.258237	*	-0.166746		-0.0955676
Region 8	-0.0191775		0.0535946		0.0246938		0.150326		0.395222	*	0.0105176
Region 9	-0.258743	**	0.756832	*	-0.056518		0.14494		0.117647		0.0488259
Region 10	-0.258006	**	0.209481	**	-0.178693		0.0722335		-0.0176791		-0.244093	*
Region 11	0.574376	*	0.646527	*	0.228509		0.285343		-0.288959		-0.170833
Region 12	0.364719		-0.0176153		-0.166145		-0.336633		-0.913847		-0.199777
Married/Cohabitting	0.101673		-0.18326	*	-0.0226877		-0.178829	*	-0.150268		-0.339571	*
Public Insurance System (FONASA)	0.115213		0.315841	*	-0.193579		0.111495		0.158384		0.31622	*
No insurance	0.817069	*	0.820185	*	0.212249		0.827439	*	1.09756	*	1.11037	*
Constant	2.81418	*	3.61103	*	1.42534	**	4.31499	*	3.16741	*	3.40717	*
N	252345		252345		252345		252345		252345		252345
F test	35.61	*	56.13	*	26.94	*	55.05	*	23.1	*	21.63	*
(*) Significant at 99%; (**) Significant at 95%
